# Supplementary material for: Novel fluorescence resonance energy transfer optical sensors for vitamin B12 detection using thermally reduced carbon dots
Source: Royal Society of Chemistry journal article supplement (doi:10.1039/c4nj00538d), 2014-10-27
Supplement: c4nj00538d1.pdf [file c4nj00538d1.pdf]

## Support Information

### Novel Fluorescence Resonance Energy Transfer Optical Sensors for Vitamin B12 Detection using Thermal Reduced Carbon Dots

Jilong Wang,<sup>a</sup> Junhua Wei,<sup>a</sup> Siheng Su,<sup>a</sup> and Jenny Qiu<sup>\*a</sup>

<sup>a</sup> Department of Mechanical Engineering, Texas Tech University, 2500 Broadway, P.O. Box 43061, Lubbock, TX 79409, United States

\*Corresponding Author: E-mail: Jenny.Qiu@ttu.edu

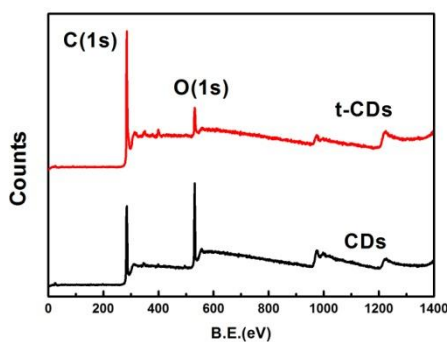

Figure S1. XPS spectra of CDs and t-CDs

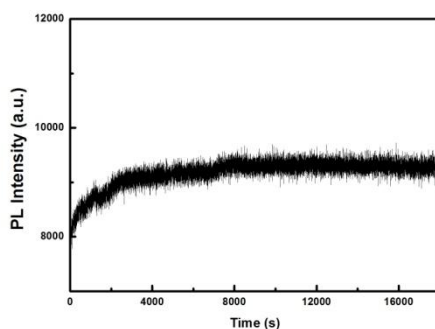

Figure S2. Photostability of t-CDs

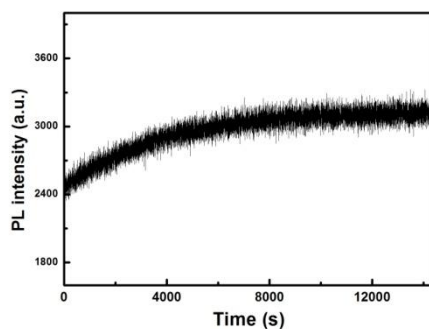

Figure S3. Kinetic behavior of the fluorescence of the t-CDs–VB12 system

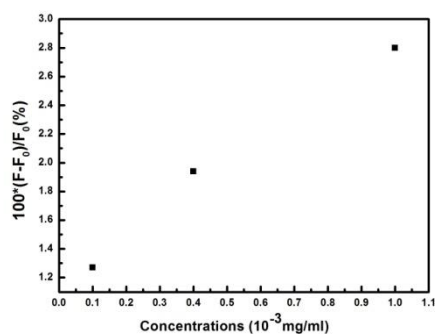

Figure S4 the plot of calibration graph for the efficiency of FRET process vs. concentration

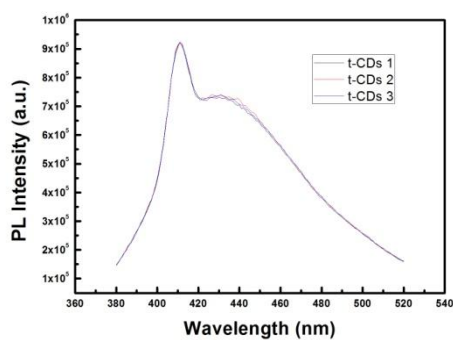

Figure S5 Standard Deviation of t-CDs (0.36%)

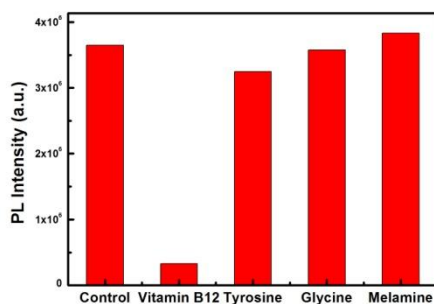

Figure S6 t-CDs with 100  $\mu$  g/ml different chemicals
